# Supplementary material
Source: HighWire-hosted journal article supplement (https://erj.ersjournals.com/content/55/2/1901752)
Supplement: inline-supplementary-material-1 [file inline-supplementary-material-1.pdf]

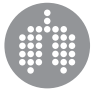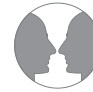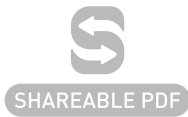

# Attitudes of patients with chronic breathlessness towards treatment with opioids

Cornelia A. Verberkt <sup>1</sup>, Marieke H.J. van den Beuken-van Everdingen <sup>2</sup>,  
Emiel F.M. Wouters<sup>3,4</sup> and Daisy J.A. Janssen<sup>1,3</sup>

**Affiliations:** <sup>1</sup>Dept of Health Services Research, CAPHRI School for Public Health and Primary Care, Faculty of Health Medicine and Life Sciences, Maastricht University, Maastricht, The Netherlands. <sup>2</sup>Centre of Expertise for Palliative Care, Maastricht University Medical Centre (MUMC+), Maastricht, The Netherlands. <sup>3</sup>Dept of Research and Development, CIRO, Horn, The Netherlands. <sup>4</sup>Dept of Respiratory Medicine, Maastricht University Medical Centre (MUMC+), Maastricht, The Netherlands.

**Correspondence:** Cornelia A. Verberkt, P.O. Box 616 6200 MD Maastricht, The Netherlands. E-mail: c.vandenberg@maastrichtuniversity.nl

 @ERSpublications

**Attitudes of patients towards opioid treatment for chronic breathlessness are mixed, with 37% of patients willing to use opioids, 25% unwilling and 38% of patients indecisive. Physicians are an important source of information for these patients.** <http://bit.ly/2pvNtLJ>

**Cite this article as:** Verberkt CA, van den Beuken-van Everdingen MHJ, Wouters EFM, *et al.* Attitudes of patients with chronic breathlessness towards treatment with opioids. *Eur Respir J* 2020; 55: 1901752 [<https://doi.org/10.1183/13993003.01752-2019>].

This single-page version can be shared freely online.

## To the Editor:

Breathlessness is the most common symptom in advanced chronic lung disease or chronic heart failure (CHF) [1]. Opioids are recommended for palliative treatment of breathlessness persisting despite optimal pharmacological and non-pharmacological treatment [2, 3]. However, physicians don't always consider opioids for chronic breathlessness [4, 5] and experience barriers when considering opioids, such as resistance of patients [6]. This can limit effective palliative treatment. Qualitative studies in patients with COPD and CHF revealed fear of dependence and fear of imminent death as the most important barriers to opioid use. The reason to start treatment was to do as much as possible [7–9]. These qualitative studies were only conducted in small patient populations. Therefore, our aims were to assess the willingness of patients with chronic lung disease or CHF to use opioids for breathlessness, irrespective of a current indication for opioid treatment; and to assess their barriers towards opioid use and reasons to use opioids. Finally, we aimed to compare willingness differences according to sex, age, educational level, diagnosis and breathlessness severity.
